# Supplementary material for: A noncanonical endocytic pathway is involved in the internalization of 3 μm polystyrene beads into HeLa cells
Source: Royal Society of Chemistry journal article supplement (doi:10.1039/d2bm01353c), 2022-01-01
Supplement: d2bm01353c1.pdf [file d2bm01353c1.pdf]

## Supporting Information

### **A noncanonical endocytic pathway is involved in the internalization of 3 $\mu\text{m}$ polystyrene beads into HeLa cells**

Hisaaki Hirose<sup>1\*</sup>, Masashi Maekawa<sup>2</sup>, Hiroki Ida<sup>3,4,5,6,7</sup>, Masashi Kuriyama<sup>1</sup>, Yasufumi Takahashi<sup>3,8</sup>, Shiroh Futaki<sup>1\*</sup>

<sup>1</sup> Institute for Chemical Research, Kyoto University, Uji, Kyoto 611-0011, Japan

<sup>2</sup> Division of Physiological Chemistry and Metabolism, Graduate School of Pharmaceutical Sciences, Keio University, Minato-ku, Tokyo 105-8512, Japan

<sup>3</sup> Department of Electrical Engineering, Graduate School of Engineering, Nagoya University, Aichi 464-8601, Japan

<sup>4</sup> The Frontier Research Institute for Interdisciplinary Sciences, Tohoku University, Miyagi 980-8578, Japan

<sup>5</sup> Precursory Research for Embryonic Science and Technology, Science and Technology Agency (JST), Saitama 332-0012, Japan

<sup>6</sup> Advanced Institute for Materials Research, Tohoku University, Miyagi 980-8577, Japan

<sup>7</sup> Graduate School of Environmental Studies, Tohoku University, Miyagi 980-8579, Japan

<sup>8</sup> WPI Nano Life Science Institute (WPI NanoLSI), Kanazawa University, Ishikawa 920-1192, Japan

\*Corresponding: [hirose.hisaaki.5m@kyoto-u.ac.jp](mailto:hirose.hisaaki.5m@kyoto-u.ac.jp), [futaki@scl.kyoto-u.ac.jp](mailto:futaki@scl.kyoto-u.ac.jp)

## Supplementary Figures

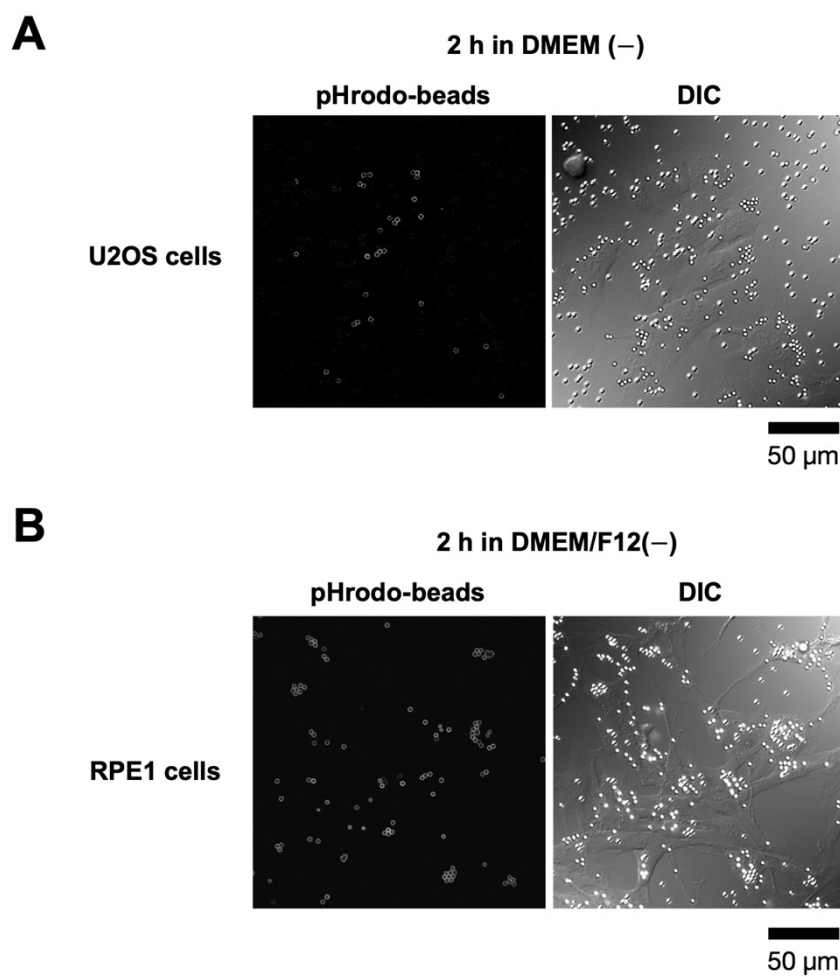

**Fig. S1. Cellular uptake of pHrodo-beads (3  $\mu$ m) into (A) U2OS cells and (B) RPE1 cells. Scale bar, 50  $\mu$ m.**

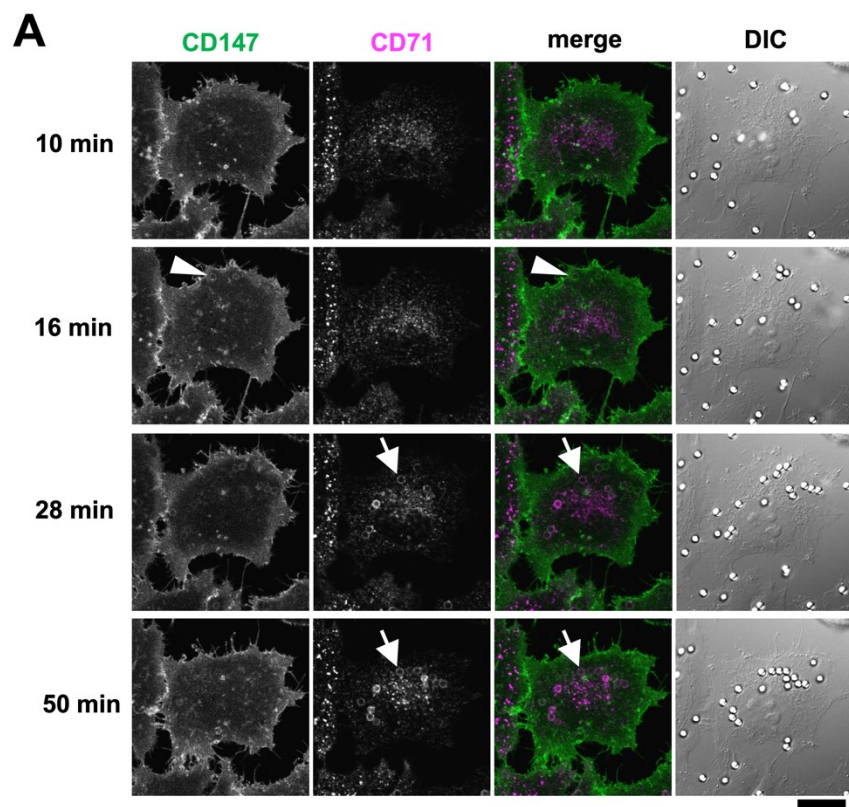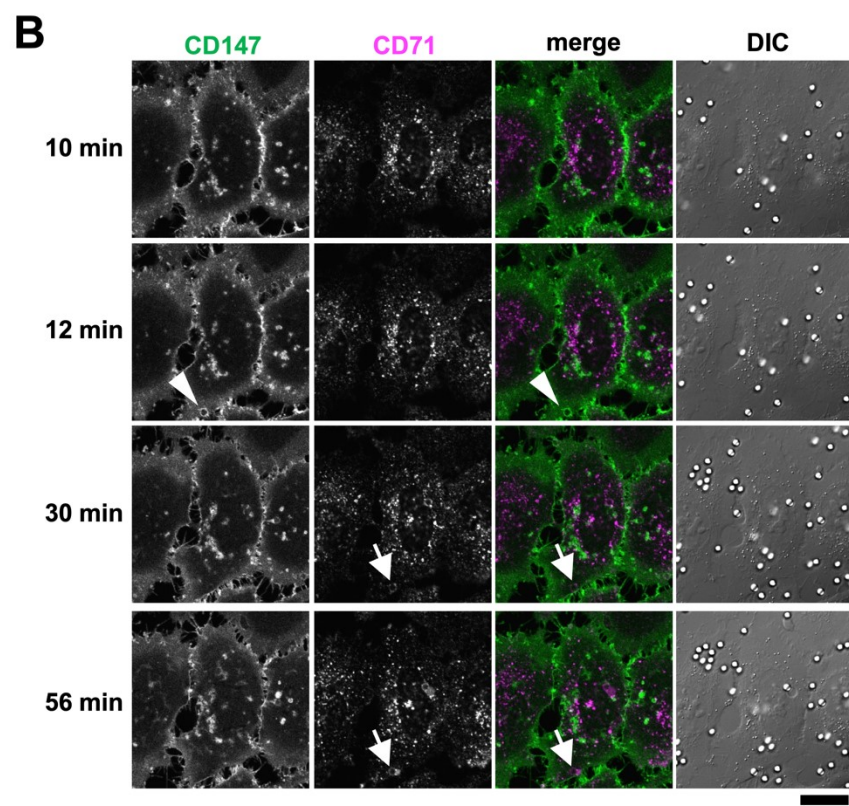

**Fig. S2. Cellular uptake of (A) amino beads (3  $\mu\text{m}$ ) and (B) carboxyl beads (3  $\mu\text{m}$ ) into HeLa cells without labeling pHrodo.** The cells were stained with Alexa488- and Alexa647-labeled antibodies against CD147 and CD71, respectively. Scale bar, (A) 20  $\mu\text{m}$ , (B) 20  $\mu\text{m}$ . Green color represents CD147 signal (Alexa488); Magenta color represents CD71 signal (Alexa647). Arrowheads indicate the early stage of internalization of the beads; arrows indicate maturation or acidification of endosomes containing the beads. The time point zero represents the start of the incubation of pHrodo-beads with cells. DIC, differential interference contrast.

## **Supplementary Video**

**Video S1. Time-lapse video of HeLa cells incubated with pHrodo-beads using scanning ion conductance microscopy** (The movie of Fig. 6B). The images were captured every approximately 2 min.
